# Supplementary material for: miR-27b attenuates apoptosis induced by transmissible gastroenteritis virus (TGEV) infection via targeting runt-related transcription factor 1 (RUNX1)
Source: PeerJ journal article supplement (doi:10.7717/peerj.1635), 2016-02-04

24 hpi

48 hpi

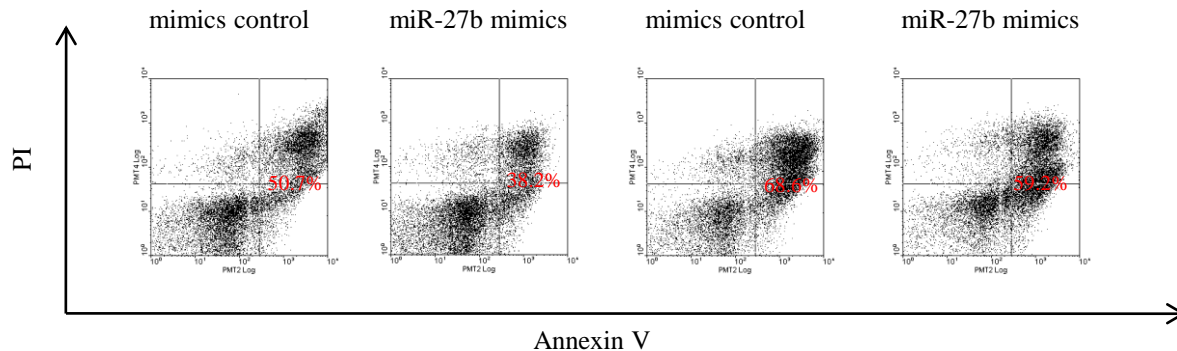

24 hpi

48 hpi

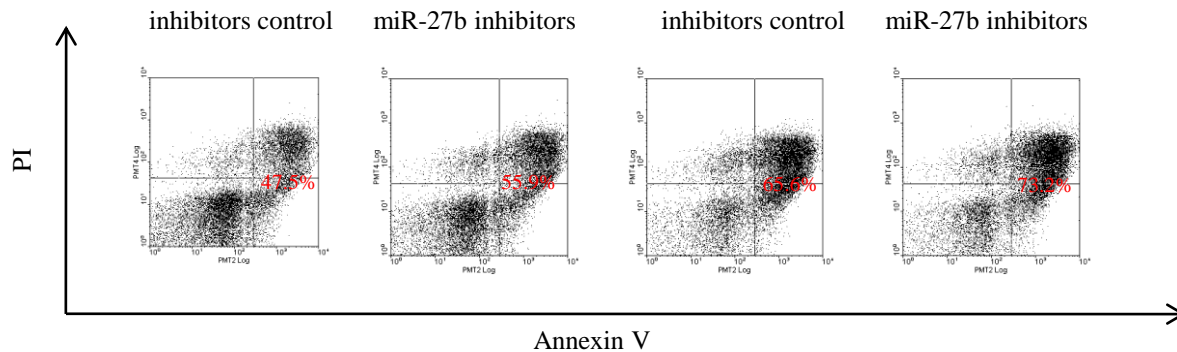

Supplement: Fig_1A.pdf [file Fig_1A.pdf]
