# Supplementary material for: miR-27b attenuates apoptosis induced by transmissible gastroenteritis virus (TGEV) infection via targeting runt-related transcription factor 1 (RUNX1)
Source: PubMed Central journal article supplement (PMC4748701; doi:10.7717/peerj.1635), 2016-02-04

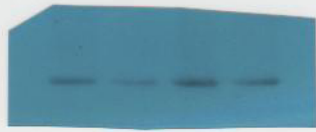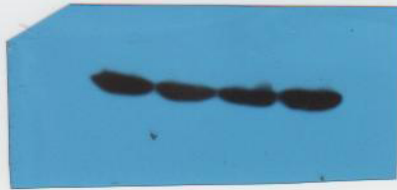

Supplement: peerj-04-1635-s015.pdf [file peerj-04-1635-s015.pdf]
