# Supplementary material for: miR-27b attenuates apoptosis induced by transmissible gastroenteritis virus (TGEV) infection via targeting runt-related transcription factor 1 (RUNX1)
Source: PeerJ. 2016 Feb 4;4:e1635. doi: 10.7717/peerj.1635 (PMC4748701; doi:10.7717/peerj.1635)
Supplement: Supplemental Information 2 — Figs. 1B and 1C effect of the miR-27b on caspase activities. [file peerj-04-1635-s005.xls]

## Sheet: Raw Data 2
		Condition	OD (24 h)	OD (48 h)
	casepase 3	mimics control	0.8773	1.0252
			0.9536	0.9936
			1.0298	0.9623
		miR-27b mimics	0.7628	0.8623
			0.6895	0.8352
			0.6007	0.8199
		Condition	OD (24 h)	OD (48 h)
	casepase 3	inhibitors control	0.9389	1.1542
			0.9915	1.3093
			1.1983	1.1766
		miR-27b inhibitors	1.462	1.7938
			1.3562	1.6612
			1.5125	1.8188
		Condition	OD (24 h)	OD (48 h)
	casepase 9	mimics control	0.4258	0.4909
			0.5762	0.5775
			0.5008	0.5664
		miR-27b mimics	0.2844	0.3376
			0.3095	0.3794
			0.3346	0.3887
		Condition	OD (24 h)	OD (48 h)
	casepase 9	inhibitors control	0.4754	0.5474
			0.5657	0.6302
			0.5603	0.6064
		miR-27b inhibitors	0.7738	0.8622
			0.6831	0.7729
			0.7044	0.8174
