# Supplementary material for: miR-27b attenuates apoptosis induced by transmissible gastroenteritis virus (TGEV) infection via targeting runt-related transcription factor 1 (RUNX1)
Source: PeerJ. 2016 Feb 4;4:e1635. doi: 10.7717/peerj.1635 (PMC4748701; doi:10.7717/peerj.1635)
Supplement: Supplemental Information 3 — Fig. 2C 3-miR-27b directly targets the 3′ UTR of RUNX1 mRNA. [file peerj-04-1635-s006.xls]

## Sheet: Raw Data 3
	Condition	Firefly	Renilla
	RUNX1-mut, mimics control	2086792	17264221
		1865253	16656709
		2156358	16383320
	RUNX1-mut, miR-27b mimics	3664605	30929266
		3855621	30613630
		3595623	33007819
		Firefly	Renilla
	RUNX1-WT, mimics control	5365539	43872679
		5056325	43990027
		5226398	41549864
	RUNX1-WT, miR-27b mimics	3720815	9860159
		3205263	9808104
		3850213	9240511
		Firefly	Renilla
	RUNX1-mut, inhibitors control	2062788	18977649
		2256325	18727497
		2145852	16372850
	RUNX1-mut, miR-27b inhibitors	4080841	34197447
		3926532	35535114
		3912658	37952782
		Firefly	Renilla
	RUNX1-WT, inhibitors control	5920720	52120336
		5869532	49304068
		5896752	48530268
	RUNX1-WT,miR-27b inhibitors	4281440	71928192
		4563542	57883966
		4465352	60764510
