# Supplementary material for: miR-27b attenuates apoptosis induced by transmissible gastroenteritis virus (TGEV) infection via targeting runt-related transcription factor 1 (RUNX1)
Source: PeerJ. 2016 Feb 4;4:e1635. doi: 10.7717/peerj.1635 (PMC4748701; doi:10.7717/peerj.1635)
Supplement: Supplemental Information 7 — Fig. 3B real-time PCR analysis of the expression of Bax in cells transfected with miR-27b mimics and inhibitors. [file peerj-04-1635-s010.xlsx]

## Sheet: Sheet1
Fig 3B Raw Data-Real-time PCR analysis of the expression of Bax in cells transfected with miR-27b mimics and inhibitors
	Time for treatment		Ct value of β-actin	Ct value of Actin
	24 h	mimics control	25.1852	14.5863
			25.7759	14.6059
			25.6813	14.8867
		miR-27b mimics	26.5825	13.8259
			26.78	14.608
			26.5606	14.0758
	48 h	mimics control	25.0275	15.0876
			25.0953	14.2552
			25.2162	15.0958
		miR-27b mimics	26.7732	15.4882
			26.9705	15.2424
			26.511	14.8533
	24 h	inhibitors control	25.8561	14.2736
			26.345	14.5714
			25.9658	14.8463
		miR-27b inhibitors	24.5021	14.7072
			24.6662	14.6415
			24.3303	14.2248
	48 h	inhibitors control	26.3719	15.3035
			26.1071	15.5838
			26.8827	15.8184
		miR-28b inhibitors	24.6915	15.6893
			24.892	15.8487
			24.4647	15.6589
	Data analysis with ddCT
			Bax	β-actin	Delta Ct	dCt(exp) -
			Ct		Ct-Ct(HPRT)	dCt(act)	2exp(-ddCt)
	24 h	mimics control	25.55	14.69	10.86	0	1
		miR-27b mimics	26.64	14.17	12.47	1.61	0.327598
	48 h	mimics control	25.11	14.81	10.3	0	1
		miR-27b mimics	26.75	15.19	11.56	1.26	0.417544
	24 h	inhibitors control	26.06	14.56	11.5	0	1
		miR-27b inhibitors	24.51	14.52	9.99	-1.51	2.8481
	48 h	inhibitors control	26.45	15.57	10.88	0	1
		miR-27b inhibitors	24.68	15.73	8.95	-1.93	3.81055
