# Supplementary material for: miR-27b attenuates apoptosis induced by transmissible gastroenteritis virus (TGEV) infection via targeting runt-related transcription factor 1 (RUNX1)
Source: PeerJ. 2016 Feb 4;4:e1635. doi: 10.7717/peerj.1635 (PMC4748701; doi:10.7717/peerj.1635)
Supplement: Supplemental Information 8 — Figure 4A silencing effect of RUNX1 siRNAs on RUNX1 at mRNA level. [file peerj-04-1635-s011.xlsx]

## Sheet: Sheet1
			Fig 4A Raw Data-Silencing effect of RUNX1 siRNAs on RUNX1 at mRNA level
				Ct value of RUNX1	Ct value of β-actin
			irrelevant siRNA	21.4002	11.6359
				20.6246	11.5926
				20.0168	12.083
			siRUNX1-1	22.5038	13.1031
				21.5075	13.095
				21.7711	13.5262
			siRUNX1-2	22.5784	12.2243
				22.8249	12.1164
				23.0878	12.0998
			siRUNX1-3	23.9754	13.9244
				23.0319	13.5464
				22.4918	13.45
			Data analysis with ddCT
				RUNX1	β-actin	Delta Ct	dCt(exp) -
				Ct		Ct-Ct(HPRT)	dCt(act)	2exp(-ddCt)
			irrelevant siRNA	20.68	11.77	8.91	0	1
			siRUNX1-1	21.93	13.24	8.69	-0.22	1.16473
			irrelevant siRNA	20.68	11.77	8.91	0	1
			siRUNX1-2	22.83	12.14	10.69	1.78	0.291183
			irrelevant siRNA	20.68	11.77	8.91	0	1
			siRUNX1-3	23.16	13.64	9.52	0.61	0.655197
